# Supplementary material for: Prioritization of Critical Factors for Surveillance of the Dissemination of Antibiotic Resistance in Pseudomonas aeruginosa: A Systematic Review
Source: MDPI journal article supplement (doi:10.3390/ijms242015209), 2023-10-15
Supplement: s1 [file s1]

**Table S1.** Characterization of mobile genetic elements (MGEs), integrons, associated with antibiotic resistance genes (ARGs) in *P. aeruginosa*

| Source      | MGEs             | ARGs associated                                                                                               | Geographic region | Year       | Reference |
|-------------|------------------|---------------------------------------------------------------------------------------------------------------|-------------------|------------|-----------|
| Human       | class 1 integron | <i>aacA4, aadA7, bla<sub>OXA-56</sub></i>                                                                     | Brazil            | 2017       | [50]      |
| Environment | class 1 integron | <i>aadA7, bla<sub>TEM-116</sub>, sul1</i>                                                                     | Croatia           |            | [51]      |
| Human       | class 1 integron | <i>bla<sub>VIM-2</sub>, qacF, aacA4, catB3, bla<sub>OXA-30</sub>, aadA1, qacEΔ1</i>                           | Korea             |            | [52]      |
| Human       | class 1 integron | <i>bla<sub>IMP-10</sub>, aacA7</i>                                                                            | China             | 2012       | [53]      |
| Human       | class 1 integron | <i>aac(6')-33, bla<sub>GES-19</sub>, aac(6')-Ib-cr, bla<sub>OXA-2</sub>, qac, aadA1, qacEΔ1, sul1</i>         | Mexico            | 2017       | [54]      |
| Human       | class 1 integron | <i>bla<sub>GES-1</sub>, acc(6')-Ib, aph(3')-XV, sul1, floR, tetR, tet(G)</i>                                  | China             | 2010       | [55]      |
| Human       | class 1 integron | <i>aadB</i>                                                                                                   | Thailand          | 2007, 2008 | [56]      |
|             | class 1 integron | <i>aacA7, aacA7b</i>                                                                                          |                   |            |           |
|             | class 1 integron | <i>aac(3)-Ic-smr, cmlA5b</i>                                                                                  |                   |            |           |
|             | class 1 integron | <i>aadA6</i>                                                                                                  |                   |            |           |
|             | class 1 integron | <i>aacA7, aacA7</i>                                                                                           |                   |            |           |
|             | class 1 integron | <i>bla<sub>PSE-1</sub>, aadA2</i>                                                                             |                   |            |           |
|             | class 1 integron | <i>aadB, cmlA6, aadA15</i>                                                                                    |                   |            |           |
|             | class 1 integron | <i>bla<sub>VEB-2</sub>, aadB, arr, cmlA5, bla<sub>OXA-10</sub>, aadA1</i>                                     |                   |            |           |
|             | class 1 integron | <i>sul1, ant(2'')-Ia, aadA6, aac(6')-Ib', aadA2, bla<sub>OXA</sub>, bla<sub>CARB</sub>, bla<sub>OXA</sub></i> |                   |            | [57]      |
| Human       | class 1 integron | <i>bla<sub>GES-5</sub>, bla<sub>GES-5</sub>, bla<sub>GES-5</sub>, bla<sub>GES-5</sub></i>                     | China             | 2012       | [58]      |
| Human       | class 1 integron | <i>aac(6')-33, bla<sub>GES-19</sub>, aacA4, bla<sub>OXA-2</sub>, aadA1, qacEΔ1, sul1</i>                      | Brazil            | 2016       | [59]      |
| Human       | class 1 integron | <i>aadB, aac6-II, bla<sub>PSE-1</sub></i>                                                                     | China             | 2006, 2007 | [60]      |
|             | class 1 integron | <i>dfrA17, aadA5</i>                                                                                          |                   |            |           |
|             | class 1 integron | <i>aac6-II</i>                                                                                                |                   |            |           |
| Human       | class 1 integron | <i>aadA7, qacEΔ1, sul1</i>                                                                                    | Cyprus            |            | [61]      |
| Salmon      | class 1 integron | <i>aac(6')-31, qacH, bla<sub>OXA-2</sub></i>                                                                  | Chile             | 2008-2010  | [62]      |
| Human       | class 1 integron | <i>qacE, dfrAS1, aadA1, bla<sub>OXA-10</sub>, cmlA1, aac(6')-Ib-cr, bla<sub>SIM-1</sub></i>                   | United Kingdom    | 2019       | [63]      |
|             | class 1 integron | <i>dfrA1, aadA1, bla<sub>OXA-10</sub>, aac(6')-Ib-cr, bla<sub>SIM-1</sub></i>                                 |                   |            |           |

|       |                     |                                                                                              |            |               |      |
|-------|---------------------|----------------------------------------------------------------------------------------------|------------|---------------|------|
| Human | class 1<br>integron | <i>aadB, cmlA6, bla<sub>OXA-4</sub>, aadA2</i>                                               | Japan      | 2014,<br>2018 | [64] |
|       | class 1<br>integron | <i>bla<sub>OXA-4</sub>, aadA2, aadB</i>                                                      |            |               |      |
|       | class 1<br>integron | <i>bla<sub>OXA-4</sub>, aadA2</i>                                                            |            |               |      |
|       | class 1<br>integron | <i>aacA31</i>                                                                                |            |               |      |
| Human | class 1<br>integron | <i>aacA4</i>                                                                                 | Czech      | 2007          | [65] |
|       | class 1<br>integron | <i>aadB, aadA13</i>                                                                          |            |               |      |
|       | class 1<br>integron | <i>aadB</i>                                                                                  |            |               |      |
|       | class 1<br>integron | <i>aacA7, aadA6</i>                                                                          |            |               |      |
|       | class 1<br>integron | <i>aacA7, aacA7, aadA6</i>                                                                   |            |               |      |
|       | class 1<br>integron | <i>aacA7, aadA6</i>                                                                          |            |               |      |
|       | class 1<br>integron | <i>aacA7</i>                                                                                 |            |               |      |
|       | class 1<br>integron | <i>aacA8, bla<sub>OXA-2</sub>, aacA7</i>                                                     |            |               |      |
|       | class 1<br>integron | <i>aacA8, bla<sub>OXA-2</sub>, aacA7, aacA7, aadA6</i>                                       |            |               |      |
|       | class 1<br>integron | <i>aacA4, catB10</i>                                                                         |            |               |      |
|       | class 1<br>integron | <i>aacA4, bla<sub>PSE-1</sub>, aadA2</i>                                                     |            |               |      |
|       | class 1<br>integron | <i>aacA4, aacA7, aacA7</i>                                                                   |            |               |      |
|       | class 1<br>integron | <i>aacA4, bla<sub>IMP-7</sub>, aacA4, aacA4, bla<sub>OXA-2</sub></i>                         |            |               |      |
|       | class 1<br>integron | <i>aadB, cmlA</i>                                                                            |            |               |      |
|       | class 1<br>integron | <i>bla<sub>OXA-31</sub>, aadA2, cmlA</i>                                                     |            |               |      |
| Human | class 1<br>integron | <i>bla<sub>OXA-101</sub>, aacA4, catB</i>                                                    | Colombia   | 2005,<br>2008 | [66] |
| Dog   | class 1<br>integron | <i>aadA</i>                                                                                  | U.S.A      | 2003,<br>2006 | [67] |
| Human | class 1<br>integron | <i>sul1, emrE, aadA, bla<sub>OXA-10</sub>, cmlA5, arr-2, ant(2')-Ia, bla<sub>VEB-1</sub></i> | Thailand   |               | [68] |
| Human | integron            | <i>bla<sub>VIM-2</sub></i>                                                                   | Costa Rica | 2010          | [69] |
|       | integron            | <i>bla<sub>IMP-18</sub></i>                                                                  |            |               |      |
| Human | class 1<br>integron | <i>aadB</i>                                                                                  | Iran       | 2015,<br>2016 | [70] |
|       | class 1<br>integron | <i>aadA6</i>                                                                                 |            |               |      |
|       | class 1<br>integron | <i>aadB, aadA1, bla<sub>OXA-10</sub>, aac(6)-II, bla<sub>OXA-10</sub></i>                    |            |               |      |
|       | class 1<br>integron | <i>aac(6)-II, aacA4, bla<sub>OXA-10</sub>, bla<sub>VIM-6</sub>, aac(6)-Ib</i>                |            |               |      |

|       |                     |                                                                                                                                    |            |               |      |
|-------|---------------------|------------------------------------------------------------------------------------------------------------------------------------|------------|---------------|------|
|       | class 1<br>integron | <i>aacA4, catB10</i>                                                                                                               |            |               |      |
|       | class 1<br>integron | <i>aacA4, bla<sub>OXA-10</sub></i>                                                                                                 |            |               |      |
|       | class 2<br>integron | <i>dfrA1</i>                                                                                                                       |            |               |      |
|       | class 3<br>integron | <i>aacA7, aacA4, bla<sub>OXA-2</sub></i>                                                                                           |            |               |      |
| Human | class 1<br>integron | <i>bla<sub>OXA-10</sub>, aadB, bla<sub>VIM-2</sub>, aadB, bla<sub>OXA-10</sub></i>                                                 | Tunisia    |               | [71] |
| Human | class 1<br>integron | <i>bla<sub>GES-13</sub>, bla<sub>VIM-2</sub>, bla<sub>VIM-6</sub>, bla<sub>OXA-10</sub>, aacA(6')-Ib, aacA(6')-II, aadA6, gcuD</i> | Malaysia   | 2014          | [72] |
|       | class 1<br>integron | <i>bla<sub>GES-20</sub>, bla<sub>IMP-4</sub>, bla<sub>VIM-2</sub>, bla<sub>VIM-11</sub></i>                                        |            |               |      |
| Human | class 1<br>integron | <i>bla<sub>GES-2</sub></i>                                                                                                         | Korea      | 2016,<br>2017 | [73] |
| Human | class 1<br>integron | <i>aadA22, aadB</i>                                                                                                                | China      | 2018          | [74] |
|       | class 1<br>integron | <i>aac(6')-II, bla<sub>PSE-1</sub></i>                                                                                             |            |               |      |
|       | class 1<br>integron | <i>dhfr2, aacA4, aadA1</i>                                                                                                         |            |               |      |
|       | class 1<br>integron | <i>aacA4, bla<sub>OXA-101</sub>, aadA5</i>                                                                                         |            |               |      |
|       | class 1<br>integron | <i>qnrVC, gcu165, arr2, dfrA22e, aacA4, gcu35, bla<sub>OXA-1</sub>, catB3</i>                                                      |            |               |      |
|       | class 1<br>integron | <i>aacA4, bla<sub>OXA-101</sub>, aadA5</i>                                                                                         |            |               |      |
| Human | class 1<br>integron | <i>qacED1, aadB, aadA10e, sul1, bla<sub>OXA-10</sub></i>                                                                           | U.S.A      | 1999-<br>2018 | [75] |
| Human | class 1<br>integron | <i>bla<sub>VIM-2</sub>, bla<sub>PIB-1</sub>, aacA4</i>                                                                             | Greece     | 2005          | [76] |
| Human | class 1<br>integron | <i>bla<sub>VIM-2</sub>, aacA7, aacC1, aacA4, qacED1, sul1</i>                                                                      | Portugal   | 2008,<br>2010 | [77] |
| Human | class 1<br>integron | <i>bla<sub>IMP-1</sub></i>                                                                                                         | China      | 2016          | [78] |
|       | class 1<br>integron | <i>bla<sub>IMP-8</sub></i>                                                                                                         |            |               |      |
|       | class 1<br>integron | <i>bla<sub>CTX-M-14</sub></i>                                                                                                      |            |               |      |
| Human | class 1<br>integron | <i>bla<sub>VIM-5</sub></i>                                                                                                         | Bangladesh | 2016          | [79] |
|       | class 1<br>integron | <i>aacA8, bla<sub>OXA-2</sub>, aacA7</i>                                                                                           |            |               |      |
| Human | class 1<br>integron | <i>bla<sub>GES-2</sub>, aacA4, gcuE15, aphA15</i>                                                                                  | Australia  | 2006,<br>2007 | [80] |
| Human | class 1<br>integron | <i>bla<sub>IMP-7</sub>, aacA7, bla<sub>VIM-2</sub></i>                                                                             | Malaysia   | 2002-<br>2008 | [81] |
|       | class 1<br>integron | <i>bla<sub>IMP-4</sub>, aadA6</i>                                                                                                  |            |               |      |
| Human | class 1<br>integron | <i>aadB</i>                                                                                                                        | Spain      | 2005-<br>2008 | [82] |
| Human | class 1<br>integron | <i>aacA4, aadA1</i>                                                                                                                | China      | 2009,<br>2010 | [83] |

|                       |                     |                                                                        |           |               |      |
|-----------------------|---------------------|------------------------------------------------------------------------|-----------|---------------|------|
|                       | class 1<br>integron | <i>bla<sub>OXA-31</sub>, aadA2</i>                                     |           |               |      |
|                       | class 1<br>integron | <i>aadA1, arr, catB3</i>                                               |           |               |      |
|                       | class 1<br>integron | <i>cmlA5, cmlA, aadA1</i>                                              |           |               |      |
| Dog                   | class 1<br>integron | <i>aacA4</i>                                                           | Brazil    | 2010-<br>2012 | [84] |
|                       | class 1<br>integron | <i>aadA6</i>                                                           |           |               |      |
| Dog                   | class 1<br>integron | <i>aacA7, bla<sub>VIM-2</sub>, dfrB5, aacC5b</i>                       | Korea     | 2013-<br>2017 | [85] |
|                       | class 1<br>integron | <i>dfra</i>                                                            |           |               |      |
| Human                 | class 1<br>integron | <i>aac(6')-Iaf, bla<sub>IMP-1</sub>, qacEA1, sul1</i>                  | Japan     | 2007          | [86] |
| Human                 | class 1<br>integron | <i>qacEA1, sul1, cmlA9, qacEA1, tetR, tetA(G), sul1</i>                | U.S.A     | 2007          | [87] |
| Human                 | class 1<br>integron | <i>bla<sub>VIM-4</sub></i>                                             | Greece    | 2001          | [88] |
| Human,<br>Environment | class 1<br>integron | <i>aph(6)-Id, aph(3'')-Ib, floR, sul2</i>                              | Singapore | 2019,<br>2020 | [89] |
|                       | class 1<br>integron | <i>bla<sub>NDM-1</sub>, msr(E), floR</i>                               |           |               |      |
|                       | class 1<br>integron | <i>aac(3)-Id, aac(6')-II, aadA6, aadA11, dfrB5, qnrVC1</i>             |           |               |      |
| Human                 | class 1<br>integron | <i>bla<sub>OXA-10</sub>, aacA4, bla<sub>VIM-2</sub>, smr-2, qacEA1</i> | Greece    | 2011          | [90] |
|                       | class 1<br>integron | <i>bla<sub>VIM-2</sub>, aacA7, dfr, qacEA1</i>                         |           |               |      |
| Human                 | class 1<br>integron | <i>bla<sub>IMP-1</sub>, aacA28, aadA1</i>                              | Japan     | 2004,<br>2006 | [91] |
|                       | class 1<br>integron | <i>bla<sub>IMP-1</sub></i>                                             |           |               |      |
|                       | class 1<br>integron | <i>aacA7, fosI, bla<sub>IMP-41</sub>, qacG</i>                         |           |               |      |
|                       | class 1<br>integron | <i>aacA7, bla<sub>IMP-11</sub>, bla<sub>OXA-2</sub>, qacG</i>          |           |               |      |
|                       | class 1<br>integron | <i>bla<sub>IMP-6</sub>, fosE</i>                                       |           |               |      |
|                       | class 1<br>integron | <i>fosE, aacA31, bla<sub>VIM-2</sub></i>                               |           |               |      |
|                       | class 1<br>integron | <i>bla<sub>IMP-10</sub>, aadA2, bla<sub>OXA-47</sub></i>               |           |               |      |
|                       | class 1<br>integron | <i>bla<sub>IMP-10</sub>, aacA1, gcuG</i>                               |           |               |      |
|                       | class 1<br>integron | <i>bla<sub>IMP-1</sub>, aacA4, aacA4, catB6, bla<sub>CARB-12</sub></i> |           |               |      |
|                       | class 1<br>integron | <i>bla<sub>IMP-1</sub>, aacA4, aacA1, gcuG, aadA1a</i>                 |           |               |      |
| public                | class 1<br>integron | <i>bla<sub>IMP-1</sub>, aadB</i>                                       | public    | public        | [92] |
|                       | class 1<br>integron | <i>bla<sub>IMP-1</sub>, aacA4</i>                                      |           |               |      |

|                       |                             |                                                                                                                         |                 |                                 |       |
|-----------------------|-----------------------------|-------------------------------------------------------------------------------------------------------------------------|-----------------|---------------------------------|-------|
| Human                 | class 1<br>integron         | <i>gar, qacEΔ1</i>                                                                                                      | Italy           |                                 | [93]  |
| Human                 | class 1<br>integron         | <i>aacA4, bla<sub>OXA-28</sub></i>                                                                                      | France          | 2004                            | [94]  |
|                       | class 1<br>integron         | <i>aacA4, gcuF1, bla<sub>OXA-28</sub></i>                                                                               |                 |                                 |       |
| Human                 | class 1<br>integron         | <i>bla<sub>IMP-18</sub>, aadA1, bla<sub>OXA-2</sub>, qacEΔ1, sul1</i>                                                   | Mexico          | 2013-<br>2015                   | [95]  |
|                       | class 1<br>integron         | <i>bla<sub>IMP-56</sub>, aadA1, bla<sub>OXA-2</sub>, qacEΔ1, sul1</i>                                                   |                 |                                 |       |
|                       | class 1<br>integron         | <i>aacA7, bla<sub>IMP-62</sub>, qacH, aacA4, aacA1, bla<sub>OXA-2</sub></i>                                             |                 |                                 |       |
| Human                 | class 1<br>integron         | <i>qacEΔ1, sul1</i>                                                                                                     | Iran            | 2016-<br>2018                   | [96]  |
|                       | class 1<br>integron         | <i>aadB, qacEΔ1, sul1</i>                                                                                               |                 |                                 |       |
|                       | class 1<br>integron         | <i>aadA6, qacEΔ1, sul1</i>                                                                                              |                 |                                 |       |
|                       | class 1<br>integron         | <i>aacA4, catB, qacEΔ1, sul1</i>                                                                                        |                 |                                 |       |
|                       | class 1<br>integron         | <i>aacA4, bla<sub>OXA-10</sub>, qacEΔ1, sul1</i>                                                                        |                 |                                 |       |
|                       | class 1<br>integron         | <i>bla<sub>OXA-31</sub>, aadA2, qacEΔ1, sul1</i>                                                                        |                 |                                 |       |
|                       | class 1<br>integron         | <i>bla<sub>OXA-10</sub>, aacA4, bla<sub>VIM-1</sub>, qacEΔ1, sul1</i>                                                   |                 |                                 |       |
|                       | class 1<br>integron         | <i>aac(3)-Ic, aacA5, cmlA5, qacEΔ1, sul1</i>                                                                            |                 |                                 |       |
|                       | class 1<br>integron         | <i>aacA5, aadA1, cmlA5, qacEΔ1, sul1</i>                                                                                |                 |                                 |       |
| Human                 | class 1<br>integron         | <i>aacA4, aphA15, aadA1, qacEΔ1, sul1</i>                                                                               | Portugal        | 2004                            | [97]  |
| Human                 | class 1<br>integron         | <i>bla<sub>VIM-2</sub>, aac(6')-II, dfrB-5, aac(3')-Id</i>                                                              | Saudi<br>Arabia | 2018                            | [98]  |
| Human                 | class 1<br>integron         | <i>aac(6')-Ib-7, bla<sub>IMP-45</sub>, bla<sub>OXA-1</sub>, catB3, qacEΔ1, sul1</i>                                     | China           | 2015-<br>2017                   | [99]  |
|                       | class 1<br>integron         | <i>qnrVC1, arr-2, dfrA22, qacEΔ1, sul1</i>                                                                              |                 |                                 |       |
| Human                 | Partial class 1<br>integron | <i>bla<sub>IMP-4</sub>, bla<sub>DIM-1</sub>, bla<sub>OXA-1</sub>, bla<sub>GES-2</sub>, bla<sub>VIM-2</sub></i>          | Mexico          | 2023                            | [46]  |
|                       | Class 1<br>integron         | <i>bla<sub>OXA-101</sub>, bla<sub>CTX-M-30</sub>, bla<sub>TEM-1b</sub></i>                                              |                 |                                 |       |
| Human                 | class 1<br>integron         | <i>bla<sub>IMP-56</sub>, aadA1, bla<sub>OXA-2</sub></i>                                                                 | Mexico          | 2023                            | [100] |
| Snake                 | class 1<br>integron         | <i>tetA(C), tetA(R), qacH, aadB, cmlA10, aadA2, qacEΔ1, sul1</i>                                                        | France          | 2004                            | [101] |
| Human                 | class 1<br>integron         | <i>bla<sub>OXA-10</sub>, aac(6')-Ib, bla<sub>IMP-8</sub>, aac(6')-Ib, aph(3')-XV, aadA10, bla<sub>OXA-2</sub>, sul1</i> | Germany         | 2009                            | [102] |
| Human,<br>Environment | class 1<br>integron         | <i>bla<sub>IMP-19</sub>, aac(6')-Ib, aadA13, qacEΔ1, sul1</i>                                                           | France          | 2009,<br>2013,<br>2015,<br>2016 | [103] |
|                       | class 1<br>integron         | <i>bla<sub>IMP-19</sub>, aac(6')-Ib, aadB, aadA13, qacEΔ1, sul1</i>                                                     |                 |                                 |       |
|                       | class 1<br>integron         | <i>bla<sub>IMP-19</sub>, qacEΔ1, sul1</i>                                                                               |                 |                                 |       |

|                       |                     |                                                                         |         |               |       |
|-----------------------|---------------------|-------------------------------------------------------------------------|---------|---------------|-------|
|                       | class 1<br>integron | <i>aac(6')-Ib, bla<sub>IMP-19</sub>, aac(6')-Ib, qacEΔ1, sul1</i>       |         |               |       |
|                       | class 1<br>integron | <i>aac(6')-Ib, qacG, aac(6')-Ib, bla<sub>IMP-19</sub>, qacEΔ1, sul1</i> |         |               |       |
|                       | class 1<br>integron | <i>aac(6')-Ib, bla<sub>IMP-19</sub>, qacEΔ1, sul1</i>                   |         |               |       |
|                       | class 1<br>integron | <i>bla<sub>IMP-19</sub>, aac(6')-Ib</i>                                 |         |               |       |
| Human                 | class 1<br>integron | <i>aadB, aadA13</i>                                                     | Hungary | 2005-<br>2007 | [104] |
|                       | class 1<br>integron | <i>aadB</i>                                                             |         |               |       |
| Human                 | class 1<br>integron | <i>bla<sub>IMP-18</sub>, aadA1, bla<sub>OXA-2</sub>, aadA1, qacEΔ1</i>  | Mexico  | 2014          | [105] |
| Human                 | class 1<br>integron | <i>aadA7</i>                                                            | Algeria | 2014-<br>2015 | [106] |
| Human,<br>Environment | class 1<br>integron | <i>aac(6')-Ib, bla<sub>PSE-1</sub>, ant(3')-Ia</i>                      | Hungary | 2008-<br>2010 | [107] |
| Human                 | class 1<br>integron | <i>bla<sub>VIM-7</sub>, aacA4, bla<sub>OXA-46</sub>, qacEΔ1, sul1</i>   | Brazil  | 2013          | [108] |
| Human                 | class 1<br>integron | <i>bla<sub>VIM-3</sub>, aacA4</i>                                       | Taiwan  | 2002-<br>2006 | [109] |
|                       | class 1<br>integron | <i>bla<sub>VIM-3</sub>, aacA4, aadB, aacA4</i>                          |         |               |       |
| Human,<br>Environment | class 1<br>integron | <i>aac(6')-II, bla<sub>PIB-1</sub>, aadA2, qacEΔ1, sul1</i>             | Spain   |               | [110] |
| Human                 | class 1<br>integron | <i>bla<sub>VIM-2</sub>, sul1</i>                                        | Russia  | 2012-<br>2017 | [111] |
|                       | class 1<br>integron | <i>aacA7, bla<sub>VIM-2</sub>, dfrB5, aacC-A5</i>                       |         |               |       |
|                       | class 1<br>integron | <i>aacA7, bla<sub>VIM-2</sub>, dfrB5, aacC-A5</i>                       |         |               |       |
|                       | class 1<br>integron | <i>aacA29a, bla<sub>VIM-2</sub>, aacA29a, qacEΔ1, sul1</i>              |         |               |       |
|                       | class 1<br>integron | <i>aacA29a, bla<sub>VIM-2</sub>, aacA29b, qacEΔ1, sul1</i>              |         |               |       |
|                       | class 1<br>integron | <i>aacA4, bla<sub>VIM-2</sub>, qacEΔ1, sul1</i>                         |         |               |       |
| Human                 | class 1<br>integron | <i>aadB, qacEΔ1, sul1</i>                                               | Spain   | 2008-<br>2010 | [112] |
|                       | class 1<br>integron | <i>aadA7, qacEΔ1, sul1</i>                                              |         |               |       |
|                       | class 1<br>integron | <i>aadA6, qacEΔ1, sul1</i>                                              |         |               |       |
|                       | class 1<br>integron | <i>aac(3)-Ia, aadA1, qacEΔ1, sul1</i>                                   |         |               |       |
|                       | class 1<br>integron | <i>aac(3)-Ia, aadA1, qacEΔ1, sul1</i>                                   |         |               |       |
|                       | class 1<br>integron | <i>aac(6')-Ib, bla<sub>OXA-46</sub>, qacEΔ1, sul1</i>                   |         |               |       |
|                       | class 1<br>integron | <i>aac(6')-Ib, qacEΔ1, sul1</i>                                         |         |               |       |
|                       | class 1<br>integron | <i>aac(6')-Ib, bla<sub>VIM-2</sub>, qacEΔ1, sul1</i>                    |         |               |       |

|       |                     |                                                                                                  |          |               |       |
|-------|---------------------|--------------------------------------------------------------------------------------------------|----------|---------------|-------|
|       | class 1<br>integron | <i>bla<sub>VIM-2</sub>, qacEΔ1, sul1</i>                                                         |          |               |       |
|       | class 1<br>integron | <i>bla<sub>VIM-2</sub>, aac(6')-Ib, aadA1</i>                                                    |          |               |       |
|       | class 1<br>integron | <i>bla<sub>VIM-2</sub>, aac(6')-Ib, aadA1, bla<sub>VIM-2</sub>, qacEΔ1, sul1</i>                 |          |               |       |
| Human | class 1<br>integron | <i>bla<sub>GES-5</sub>, aadB, ahp(3')-VIa, bla<sub>NDM-1</sub>, sul1</i>                         | Bulgaria | 2017          | [113] |
| Human | class 1<br>integron | <i>aacA55, aadA1, aacA55, aadA1a, aacA28, aadA1a, qacEΔ1, sul1</i>                               | India    | 2015          | [114] |
| Human | class 1<br>integron | <i>aac(6')-Ib, bla<sub>PSE-1</sub>, aadA2, qacEΔ1, sul1</i>                                      | Portugal | 2003,<br>2005 | [115] |
| Human | class 1<br>integron | <i>bla<sub>VEB-1</sub>-like, aadB, arr-2, cmlA5, bla<sub>OXA-10</sub>, aadA1, qacEΔ1</i>         | Thailand | 1999          | [116] |
|       | class 1<br>integron | <i>bla<sub>VEB-1</sub>-like, aadB, qacEΔ1</i>                                                    |          |               |       |
| Human | class 1<br>integron | <i>bla<sub>VIM-4</sub></i>                                                                       | Algeria  | 2016          | [117] |
| Human | class 1<br>integron | <i>bla<sub>VIM-1</sub>, aacA4, bla<sub>VIM-1</sub>, bla<sub>VIM-1</sub>, aadA1, qacEΔ1, sul1</i> | Spain    | 2006-<br>2007 | [118] |
| Human | class 1<br>integron | <i>aadB</i>                                                                                      | France   | 2011-<br>2013 | [119] |
|       | class 1<br>integron | <i>aadA6</i>                                                                                     |          |               |       |
|       | class 1<br>integron | <i>aadB, aadA11</i>                                                                              |          |               |       |
|       | class 1<br>integron | <i>dfbB1</i>                                                                                     |          |               |       |
|       | class 1<br>integron | <i>aacA4, aacC1d, gcuE</i>                                                                       |          |               |       |
|       | class 1<br>integron | <i>aacA5, bla<sub>VIM-2</sub></i>                                                                |          |               |       |
|       | class 1<br>integron | <i>aacA4, cmlA1, bla<sub>VIM-2</sub></i>                                                         |          |               |       |
| Human | class 1<br>integron | <i>aadA6</i>                                                                                     | Mexico   | 2004-<br>2005 | [120] |
|       | class 1<br>integron | <i>aacA4</i>                                                                                     |          |               |       |
|       | class 1<br>integron | <i>aacA4, aadA1</i>                                                                              |          |               |       |
|       | class 1<br>integron | <i>qacF</i>                                                                                      |          |               |       |
| Human | class 1<br>integron | <i>aadB, aadA, qacEΔ1, sul1</i>                                                                  | France   | 2001          | [121] |
| Human | class 1<br>integron | <i>aacA4, bla<sub>PSE-1</sub>, aadA2</i>                                                         | Italy    | 2000          | [122] |
| Human | class 1<br>integron | <i>bla<sub>IMP-15</sub>,</i>                                                                     | Mexico   | 2004-<br>2005 | [123] |
|       | class 1<br>integron | <i>bla<sub>VIM-2</sub></i>                                                                       |          |               |       |
| Human | class 1<br>integron | <i>aac(6')-Ib'</i>                                                                               | Germany  | 2004          | [124] |
|       | class 1<br>integron | <i>aadB, aadA1</i>                                                                               |          |               |       |

|       |                     |                                                                             |                       |               |       |
|-------|---------------------|-----------------------------------------------------------------------------|-----------------------|---------------|-------|
|       | class 1<br>integron | <i>aacA8, bla<sub>OXA-2</sub>, aacA7</i>                                    |                       |               |       |
|       | class 1<br>integron | <i>aac(6')-Ib, bla<sub>PSE-1</sub>, aadA2</i>                               |                       |               |       |
|       | class 1<br>integron | <i>aac(6')-Ib', aadA2</i>                                                   |                       |               |       |
| Human | class 1<br>integron | <i>bla<sub>NDM-1</sub>, qnrVC1, aadA6, qacED1, sul1</i>                     | Ghana                 | 2015          | [125] |
| Human | class 1<br>integron | <i>aacA4, bla<sub>IMP-5</sub>, aacA4</i>                                    | China                 | 2000          | [126] |
| Human | class 1<br>integron | <i>aacA7, bla<sub>OXA-198</sub>, cmlA1, qacED1, sul1</i>                    | Belgium               | 2010          | [127] |
| Human | class 1<br>integron | <i>aac(6')-32, bla<sub>VIM-2</sub>, qacED1</i>                              | Spain                 | 2003          | [128] |
| Human | class 1<br>integron | <i>bla<sub>VIM-18</sub>, qacED1, sul1</i>                                   | India                 |               | [129] |
| Human | class 1<br>integron | <i>aac(6')-Iaj</i>                                                          | Japan                 | 2011          | [130] |
| Human | class 1<br>integron | <i>dfrA1, bla<sub>VEB-1</sub>, qacE, sul1</i>                               | India                 | 2012          | [131] |
|       | class 1<br>integron | <i>dfrA12, bla<sub>VEB-1</sub>, aad2, qacE, sul1</i>                        |                       |               |       |
|       | class 1<br>integron | <i>bla<sub>VEB-1</sub>, aaC-Ib, qacE, sul1</i>                              |                       |               |       |
|       | class 1<br>integron | <i>dfrA17, bla<sub>VEB-1</sub>, aadA5, qacE, sul1</i>                       |                       |               |       |
| Human | class 1<br>integron | <i>bla<sub>OXA-198</sub>, catB7</i>                                         | Belgium               | 2010-<br>2013 | [132] |
| Human | class 1<br>integron | <i>bla<sub>IMP-18</sub>, aacA43, bla<sub>OXA-2</sub>, gcuD, qacED1</i>      | Puerto Rico           |               | [133] |
|       | class 1<br>integron | <i>bla<sub>IMP-18</sub>, aadA1b, bla<sub>OXA-224</sub>, qacED1</i>          |                       |               |       |
| Human | class 1<br>integron | <i>aacA7, bla<sub>VIM-2</sub>, aacC1, aacA4, qacED1, sul1</i>               | France                | 1998,<br>1997 | [134] |
|       | class 1<br>integron | <i>aacA29a, bla<sub>VIM-2</sub>, aacA29b, qacED1, sul1</i>                  |                       |               |       |
| Human | class 1<br>integron | <i>bla<sub>IMP-16</sub>, aac(6')-30, aac(6')-Ib, aadAA1, qacED1</i>         | Latin<br>America      | 1997-         | [135] |
| Human | class 1<br>integron | <i>bla<sub>VIM-2</sub>, aacA4, bla<sub>PIB-1</sub>, aadA2, qacED1, sul1</i> | Portugal              | 2000          | [136] |
| Human | class 1<br>integron | <i>bla<sub>IMP-1</sub>, aac(6')-Iae, aadA1, qacED1, sul1</i>                | Japan                 |               | [137] |
| Human | class 1<br>integron | <i>aacA29a, bla<sub>VIM-2</sub></i>                                         | Colombia              | 2004          | [138] |
| Human | class 1<br>integron | <i>bla<sub>VEB-1</sub></i>                                                  | Bangladesh,<br>France | 2003-<br>2004 | [139] |
|       | class 1<br>integron | <i>aadB, dfrA1</i>                                                          |                       |               |       |
| Human | class 1<br>integron | <i>bla<sub>IMP-15</sub>, aacA4, qacED1, sul1</i>                            | Italy                 | 2002,<br>2003 | [140] |
| Human | class 1<br>integron | <i>aacA27, bla<sub>OXA-2</sub>, qacED1, sul1</i>                            | U.S.A                 | 2010-<br>2012 | [141] |
| Human | class 1<br>integron | <i>aadB, bla<sub>OXA-205</sub></i>                                          | Lithuania             |               | [142] |



|       |                     |                                                                             |            |               |       |
|-------|---------------------|-----------------------------------------------------------------------------|------------|---------------|-------|
| Human | class 1<br>integron | <i>bla<sub>VIM-2</sub>, aadB, dfrA1, qacE, sul1</i>                         | India      | 2012-<br>2013 | [143] |
|       | class 1<br>integron | <i>aadB, aacA7, bla<sub>VIM-2</sub>, dfrA1, qacE, sul1</i>                  |            |               |       |
| Human | class 1<br>integron | <i>aadA7</i>                                                                | Algeria    | 2012-<br>2013 | [144] |
| Human | class 1<br>integron | <i>bla<sub>IMP-87</sub>, ant(2'')-Ia, bla<sub>OXA-10</sub>, aac(6')-Ib3</i> | China      | 2014-<br>2015 | [145] |
| Human | class 1<br>integron | <i>aacA29b, bla<sub>VIM-2</sub>, aacA29a, qacEΔ1, sul1</i>                  | Netherland | 2015          | [146] |
|       | class 1<br>integron | <i>aacA29e, bla<sub>VIM-2</sub>, aacA29e, qacEΔ1, sul1</i>                  |            |               |       |
|       | class 1<br>integron | <i>aacA4'-8, bla<sub>CARB-2</sub>, aadA2, qacEΔ1, sul1</i>                  |            |               |       |
| Human | class 1<br>integron | <i>AmpC</i>                                                                 | Korea      | 2011-<br>2014 | [147] |
| Human | class 1<br>integron | <i>bla<sub>VIM-2</sub>, qacEΔ1, sul1</i>                                    | India      | 2013-<br>2014 | [148] |

**Table S2.** Characterization of mobile genetic elements (MGEs), plasmids, associated with antibiotic resistance genes (ARGs) in *P. aeruginosa*

| Source | MGEs    | ARGs associated                                                                                                                                                                                                                                                                                                            | Geographic region | Year                                           | Reference |
|--------|---------|----------------------------------------------------------------------------------------------------------------------------------------------------------------------------------------------------------------------------------------------------------------------------------------------------------------------------|-------------------|------------------------------------------------|-----------|
| Human  | plasmid | <i>aph(6)-Id, aph(3'')-Ib, aac(3'')-IId, qnrS1, bla<sub>VIM-2</sub></i>                                                                                                                                                                                                                                                    | Argentina         | 2012                                           | [149]     |
| Human  | plasmid | <i>bla<sub>IMP-10</sub>, aacA7</i>                                                                                                                                                                                                                                                                                         | China             | 2012                                           | [53]      |
| Human  | plasmid | <i>bla<sub>GES-5</sub>, bla<sub>GES-5</sub>, bla<sub>GES-5</sub>, bla<sub>GES-5</sub></i>                                                                                                                                                                                                                                  | China             | 2012                                           | [58]      |
| Human  | plasmid | <i>bla<sub>KPC-2</sub></i>                                                                                                                                                                                                                                                                                                 | Argentina         | 2008, 2018                                     | [150]     |
| Human  | plasmid | <i>aph(6)-Id, aph(3'')-Ib, sul1, floR, tetR, tet(G), ant(4')-IIb, sul1, emrE, aadA, bla<sub>OXA-10</sub>, cmlA5, arr2, ant(2')-1a, bla<sub>VEB-1</sub></i>                                                                                                                                                                 | Thailand          |                                                | [68]      |
| Human  | plasmid | <i>aadA1, qnrS2, mph(A), cmlA1, tet(G), sul1, aph(3')-IIb, bla<sub>OXA-396</sub>, aac(3)-IId, bla<sub>PAO</sub>, crpP, fosA, catB7, bla<sub>KPC-2</sub>, aac(6')-IIa, ant(2'')-Ia, aph(3')-IIb, aph(3')-VI, sul1, bla<sub>CARB-2</sub>, crpP, bla<sub>PAO</sub>, bla<sub>OXA-486</sub>, fosA, catB7, bla<sub>KPC</sub></i> | China             | 2010, 2021                                     | [151]     |
| Human  | plasmid | <i>bla<sub>GES</sub>, crpP, bla<sub>KPC</sub></i>                                                                                                                                                                                                                                                                          | China             |                                                | [152]     |
| Human  | plasmid | <i>qacEΔ1, aadB, aadA10e, sul1, bla<sub>OXA10</sub></i>                                                                                                                                                                                                                                                                    | U.S.A             | 1999, 2002, 2003, 2009, 2013, 2015, 2016, 2018 | [75]      |
| Human  | plasmid | <i>bla<sub>VEB-1</sub>-like, bla<sub>OXA-10</sub>-like</i>                                                                                                                                                                                                                                                                 | Thailand          | 1994, 1996                                     | [153]     |
| Human  | plasmid | <i>bla<sub>KPC</sub>, sul1, amlA1, aadB</i>                                                                                                                                                                                                                                                                                | China             |                                                | [154]     |
| Human  | plasmid | <i>sul1, smlA1, aadB,</i>                                                                                                                                                                                                                                                                                                  |                   |                                                |           |
| Human  | plasmid | <i>bla<sub>KPC</sub></i>                                                                                                                                                                                                                                                                                                   | Colombia          | 2006, 2007, 201                                | [155]     |
| Human  | plasmid | <i>bla<sub>VIM</sub>, aacA7, aacC1, aacA4, qacEΔ1, sul1</i>                                                                                                                                                                                                                                                                | Portugal          | 2008, 2010                                     | [77]      |
| Human  | plasmid | <i>bla<sub>KPC</sub></i>                                                                                                                                                                                                                                                                                                   | Europe            |                                                | [156]     |
| Human  | plasmid | <i>bla<sub>IMP</sub>, bla<sub>CTX</sub>, aacC2, rmtB</i>                                                                                                                                                                                                                                                                   | China             | 2016                                           | [78]      |
| Human  | plasmid | <i>bla<sub>NDM</sub>, bla<sub>VIM</sub>, qnr, aad</i>                                                                                                                                                                                                                                                                      | Nigeria           | 2018, 2019                                     | [157]     |
| Human  | plasmid | <i>bla<sub>SHV-1</sub>, bla<sub>TEM-1</sub>, bla<sub>OXA-10</sub>, bla<sub>PSE-1</sub></i>                                                                                                                                                                                                                                 | Iran              | 2017, 2018                                     | [158]     |
| Human  | plasmid | <i>bla<sub>OXA-935</sub></i>                                                                                                                                                                                                                                                                                               | U.S.A             | 1999, 2002, 2003, 2009, 2013, 2015, 2016, 2018 | [159]     |

|             |         |                                                                                                                                                                                                                                           |              |           |       |
|-------------|---------|-------------------------------------------------------------------------------------------------------------------------------------------------------------------------------------------------------------------------------------------|--------------|-----------|-------|
| Environment | plasmid | <i>aph, sul1, qacEΔ1, dfrB2, bla<sub>OXA-10</sub></i>                                                                                                                                                                                     |              |           | [160] |
| Chicken     | plasmid | <i>aacA4, bla<sub>IMP-45</sub>, bla<sub>OXA-1</sub>, catB3, sul1, armA, msr(E), mph(E), aph(3')-1c, tet(C), aac(3)-IVa, aph(4)-Ia, tet(X6), floR, strB, aph(3')-Via, strB, strA, sul1, dfrA22e, arr-2, qnrVC1, tmexC3, tmexD3, topRJ3</i> | China        | 2019      | [161] |
|             | plasmid | <i>strB, strA, aac(3)-IVa, aph(4)-Ia, tet(X6), floR, strB, aph(3')-VI, strB, strA</i>                                                                                                                                                     |              |           |       |
| Human       | plasmid | <i>bla<sub>KPC-2</sub></i>                                                                                                                                                                                                                | China        | 2021      | [162] |
| Human       | plasmid | <i>aacA4</i>                                                                                                                                                                                                                              | China        |           | [163] |
| Human       | plasmid | <i>acrB, sul1, qacEΔ1, cmlA1, dfrA15, strB, strA, bla<sub>NPS-1</sub></i>                                                                                                                                                                 | India        | 1997      | [164] |
| Human       | plasmid | <i>bla<sub>IMP-1</sub></i>                                                                                                                                                                                                                | Mexico       | 2013-2015 | [95]  |
| Human       | plasmid | <i>bla<sub>PAU-1</sub></i>                                                                                                                                                                                                                | China        | 2009-2012 | [165] |
|             | plasmid | <i>sul1, qacEΔ1, aadA1, aphA15, aacA4, bla<sub>VIM-1</sub>, strA, strB</i>                                                                                                                                                                |              |           |       |
| Human       | plasmid | <i>bla<sub>KPC-2</sub></i>                                                                                                                                                                                                                | China        | 2019      | [166] |
| Human       | plasmid | <i>aac(6')-Ib-7, bla<sub>IMP-45</sub>, bla<sub>OXA-1</sub>, catB3, qacEΔ1, sul1, armA, msrE, mphE, sul1, qacEΔ1, dfrA22, arr-2, qnrVC1,</i>                                                                                               | China        | 2015-2017 | [99]  |
| Human       | plasmid | <i>bla<sub>KPC-2</sub></i>                                                                                                                                                                                                                | Mexico       | 2023      | [46]  |
|             | plasmid | <i>bla<sub>OXA-101</sub>, bla<sub>CTX-M-30</sub>, bla<sub>TEM-1b</sub></i>                                                                                                                                                                |              |           |       |
| Human       | plasmid | <i>bla<sub>IMP-56</sub>, aadA1, bla<sub>OXA-2</sub></i>                                                                                                                                                                                   | Mexico       | 2023      | [100] |
|             | plasmid | <i>AmpC</i>                                                                                                                                                                                                                               |              |           |       |
| Human       | plasmid | <i>bla<sub>OXA-10</sub>, aac(6')-Ib, bla<sub>IMP-8</sub>, aac(6')-Ib, aph(3')-XV, aadA10, bla<sub>OXA-2</sub>, sul1</i>                                                                                                                   | Germany      | 2009      | [102] |
| Human       | plasmid | <i>bla<sub>CTX-M</sub>, bla<sub>NDM</sub>, bla<sub>KPC</sub></i>                                                                                                                                                                          | Finland      | 2018      | [167] |
| Environment | plasmid | <i>APH(3')-IIa</i>                                                                                                                                                                                                                        |              |           | [168] |
| Human       | plasmid | <i>bla<sub>SIM-2</sub>, gcu104, ereA1, catB3q, gcu161, arr3, aadA1a, qacEΔ1, sul1</i>                                                                                                                                                     | China        | 2012      | [169] |
| Human       | plasmid | <i>bla<sub>KPC-113</sub></i>                                                                                                                                                                                                              | China        | 2020      | [170] |
| Human       | plasmid | <i>bla<sub>KPC</sub>, aph(3')-Iib, aph(3')-Vi, fosA, catB</i>                                                                                                                                                                             | Brazil       | 2014      | [171] |
| Human       | plasmid | <i>bla<sub>KPC-2</sub></i>                                                                                                                                                                                                                | Brazil       | 2018      | [172] |
| Human       | plasmid | <i>bla<sub>KPC-2</sub></i>                                                                                                                                                                                                                | China        | 2018      | [173] |
| Human       | plasmid | <i>bla<sub>KPC-2</sub></i>                                                                                                                                                                                                                | Brazil       | 2020      | [174] |
| Human       | plasmid | <i>bla<sub>IMP-4</sub></i>                                                                                                                                                                                                                | China        | 2009-2013 | [175] |
| Human       | plasmid | <i>aadB, bla<sub>VIM-1</sub></i>                                                                                                                                                                                                          | Spain        | 2006-2007 | [118] |
|             |         | <i>bla<sub>VIM-1</sub>, aacA4, bla<sub>VIM-1</sub>, bla<sub>VIM-1</sub>, aadA1, qacEΔ1, sul1</i>                                                                                                                                          |              |           |       |
| Human       | plasmid | <i>aacA7, bla<sub>VIM-2</sub>, aacC1, aacA4, qacEΔ1, sul1</i>                                                                                                                                                                             | Portugal     | 1995-2014 | [176] |
| Human       | plasmid | <i>aacA4, bla<sub>IMP-5</sub>, aacA4</i>                                                                                                                                                                                                  | China        | 2000      | [126] |
| Human       | plasmid | <i>bla<sub>OXA-198</sub></i>                                                                                                                                                                                                              | Belgium      | 2010-2013 | [132] |
| Human       | plasmid | <i>bla<sub>GES-2</sub></i>                                                                                                                                                                                                                | South Africa | 2000      | [177] |

|       |         |                                                                                                                                                                                       |        |           |       |
|-------|---------|---------------------------------------------------------------------------------------------------------------------------------------------------------------------------------------|--------|-----------|-------|
| Human | plasmid | <i>bla</i> <sub>KPC-2</sub>                                                                                                                                                           | China  | 2009      | [178] |
| Human | plasmid | <i>qnrVC1, dfrA47, sul1, mph(E), armA, sul1, aadA25, cmlA1, aadB, aac(6')-II, bla</i> <sub>AFM-2</sub> , <i>sul1, dfrA27, arr-3, bla</i> <sub>OXA-246</sub> , <i>cmlAB, aacA4</i>     | China  | 2021      | [179] |
| Human | plasmid | <i>bla</i> <sub>IMP-45</sub> , <i>aac(6')-Ib3, bla</i> <sub>OXA-1</sub> , <i>catB3, qnrVC6, armA, msr(E), mph(E), aph(3')-Ia, tetC, tetR, aac(6')-Ib3, floR, mexC-mexD-oprJ, fosA</i> | China  | 2014-2015 | [145] |
| Human | plasmid | <i>bla</i> <sub>KPC-2</sub> , <i>bla</i> <sub>KPC-2</sub><br><i>bla</i> <sub>KPC-33</sub>                                                                                             | Chile  | 2019      | [180] |
| Human | plasmid | <i>bla</i> <sub>TEM-1</sub> , <i>bla</i> <sub>KPC-1</sub>                                                                                                                             | China  | 2010      | [181] |
| Human | plasmid | <i>bla</i> <sub>KPC-2</sub>                                                                                                                                                           | Brazil | 2011      | [182] |
| Human | plasmid | <i>bla</i> <sub>KPC-2</sub>                                                                                                                                                           | China  | 2015      | [183] |
| Human | plasmid | <i>bla</i> <sub>NDM-1</sub>                                                                                                                                                           | India  | 2011-2012 | [184] |
| Human | plasmid | <i>aac(6')-I, aac(6')-II</i>                                                                                                                                                          | India  | 2003      | [185] |

**Table S3.** Characterization of mobile genetic elements (MGEs), transposons, associated with antibiotic resistance genes (ARGs) in *P. aeruginosa*

| Source             | MGEs                   | ARGs associated                                                                                                                                                                      | Geographic region | Year             | Reference |
|--------------------|------------------------|--------------------------------------------------------------------------------------------------------------------------------------------------------------------------------------|-------------------|------------------|-----------|
| Human              | Tn4371                 | <i>bla</i> <sub>SPM-1</sub>                                                                                                                                                          | Brazil            | 2017             | [50]      |
| Human              | Tn7339                 | <i>bla</i> <sub>IMP-10</sub> , <i>aacA7</i>                                                                                                                                          | China             | 2012             | [53]      |
| Human              | Tn6584                 | <i>bla</i> <sub>GES-1</sub> , <i>acc(6')-Ib</i> , <i>aph(3')-XV</i>                                                                                                                  | China             | 2010             | [55]      |
| Human              | Tn3                    | <i>qnrVCI</i> , <i>aph(6')-Id</i> , <i>tetG</i>                                                                                                                                      | Thailand          | 1997, 2018       | [186]     |
|                    | Tn3                    | <i>bla</i> <sub>TEM-1B</sub>                                                                                                                                                         |                   |                  |           |
|                    | Tn3                    | <i>bla</i> <sub>OXA-10</sub>                                                                                                                                                         |                   |                  |           |
| Human              | Tn402-like, Tn21       | <i>bla</i> <sub>VIM-2</sub>                                                                                                                                                          |                   |                  | [187]     |
| Human              | Tn6609                 | <i>aadA7</i> , <i>qacEΔ1</i> , <i>sul1</i>                                                                                                                                           | Cyprus            |                  | [61]      |
| Human              | Tn4401b                | <i>bla</i> <sub>KPC-2</sub>                                                                                                                                                          | Argentina         | 2008, 2018       | [150]     |
| Human              | Tn3                    | <i>aph(6)-Id</i> , <i>qnrVCI</i> , <i>tet(G)</i> , <i>tet(R)</i>                                                                                                                     | India, Australia  | 1992, 2018       | [188]     |
| Human              | Tn5393                 | <i>aph(6)-Id</i> , <i>aph(3'')-Ib</i>                                                                                                                                                | Thailand          |                  | [68]      |
|                    | TnAs3                  | <i>sul1</i>                                                                                                                                                                          |                   |                  |           |
| Human              | Tn3like                | <i>bla</i> <sub>KPC-2</sub>                                                                                                                                                          | China             | 2010, 2021       | [151]     |
| Human              | Tn3, Tn1403            | <i>bla</i> <sub>KPC-2</sub>                                                                                                                                                          | China             |                  | [154]     |
| Human              | Tn4401b                | <i>bla</i> <sub>KPC-2</sub>                                                                                                                                                          | Colombia          | 2006, 2007, 2011 | [155]     |
| Human              | Tn6356                 | <i>bla</i> <sub>VIM-2</sub> , <i>aacA7</i> , <i>aacC1</i> , <i>aacA4</i> , <i>qacEΔ1</i> , <i>sul1</i>                                                                               | Portugal          | 2008, 2010       | [77]      |
| Human              | Tn6394                 | <i>bla</i> <sub>IMP-1</sub> , <i>bla</i> <sub>CTX-M-14</sub> , <i>aacC2</i> , <i>rmtB</i>                                                                                            | China             | 2016             | [78]      |
| Human              | Tn402                  | <i>bla</i> <sub>VIM-2</sub> , <i>AmpD</i>                                                                                                                                            | Spain             | 2020             | [189]     |
|                    | Tn402                  | <i>bla</i> <sub>IMP-13</sub>                                                                                                                                                         |                   |                  |           |
|                    | Tn402                  | <i>bla</i> <sub>IMP-28</sub>                                                                                                                                                         |                   |                  |           |
| Human              | Tn501-like             | <i>aacA7</i> , <i>bla</i> <sub>VIM-2</sub> , <i>dfrB5</i> , <i>aacC-A5</i> , <i>qacEΔ1</i> , <i>sul1</i> , <i>cmlA9</i> , <i>qacEΔ1</i> , <i>tetR</i> , <i>tetA(G)</i> , <i>sul1</i> | U.S.A             | 2007             | [87]      |
| Environment        | Tn402-like             | <i>aph</i> , <i>sul1</i> , <i>qacEΔ1</i> , <i>dfrB2</i> , <i>bla</i> <sub>OXA-10</sub>                                                                                               |                   |                  | [160]     |
| Chicken            | Tn6485b                | <i>aacA4</i> , <i>bla</i> <sub>IMP-45</sub> , <i>bla</i> <sub>OXA-1</sub> , <i>catB3</i> , <i>sul1</i> , <i>armA</i> , <i>msr(E)</i> , <i>mph(E)</i> , <i>aph(3')-Ic</i>             | China             | 2019             | [161]     |
| Human, Environment | Tn4371                 | <i>bla</i> <sub>NDM-1</sub> , <i>msr(E)</i> , <i>floR</i>                                                                                                                            | Singapore         | 2019, 2020       | [89]      |
| Environment        | Tn3                    | <i>vanRA</i> , <i>vanSA</i> , <i>vanHA</i> , <i>vanA</i> , <i>vanXA</i> , <i>vanYA</i>                                                                                               | India             | 2019, 2020       | [190]     |
| Human              | Tn3                    | <i>acrB</i> , <i>sul1</i> , <i>qacEΔ1</i> , <i>cmlA1</i> , <i>dfrA15</i> , <i>strB</i> , <i>strA</i> , <i>bla</i> <sub>NPS-1</sub>                                                   | India             | 1997             | [164]     |
| Human              | Tn3                    | <i>bla</i> <sub>PAU-1</sub>                                                                                                                                                          | China             | 2009-2012        | [165]     |
| Human              | Tn6532, Tn6809, Tn6346 | <i>aadB</i> , <i>qacEΔ1</i> , <i>sul1</i>                                                                                                                                            | China             | 2011-2019        | [191]     |
| Human              | Tn6203                 | <i>bla</i> <sub>KPC-2</sub>                                                                                                                                                          | China             | 2019             | [166]     |
| Human              | Tn7517                 | <i>bla</i> <sub>TEM-1b</sub> , <i>aph(3')-Vi</i> , <i>bla</i> <sub>VIM-2</sub> , <i>qacEΔ1</i> , <i>sul1</i> , <i>bla</i> <sub>PER-1</sub> , <i>qacEΔ1</i> , <i>sul1</i>             | Uruguay           | 2016, 2021       | [192]     |
| Human              | transposon             | <i>bla</i> <sub>OXA-101</sub> , <i>bla</i> <sub>CTX-M-30</sub> , <i>bla</i> <sub>TEM-1b</sub>                                                                                        | Mexico            | 2023             | [46]      |
| Human              | Tn3                    | <i>bla</i> <sub>KPC-2</sub>                                                                                                                                                          | China             | 2018             | [173]     |
| Human              | Tn 6786                | <i>crpP</i>                                                                                                                                                                          | China             | 2010-2019        | [193]     |

|       |                 |                                                                           |                           |               |       |
|-------|-----------------|---------------------------------------------------------------------------|---------------------------|---------------|-------|
| Human | Tn6346-like     | <i>bla</i> <sub>AFM-1</sub> , <i>floR</i>                                 | China                     | 2017          | [194] |
| Human | Tn2345          | <i>bla</i> <sub>PER-1</sub>                                               | France                    | 2001          | [121] |
| Human | Tn1721-like     | <i>bla</i> <sub>PAC-1</sub> , <i>qacEΔ1</i> , <i>sul1</i>                 | Mauritius,<br>Afghanistan | 2017-<br>2019 | [195] |
| Human | Tn1403-related  | <i>aacA4</i> , <i>bla</i> <sub>OXA-677</sub> , <i>aadA1</i>               | China                     | 2018          | [196] |
|       | Tn1403-related  | <i>aacA4</i> , <i>bla</i> <sub>OXA-101</sub> , <i>aadA5</i>               |                           |               |       |
|       | Tn1403-related  | <i>bla</i> <sub>OXA-246</sub> , <i>aacA3</i> , <i>aadA13</i>              |                           |               |       |
| Human | Tn4401 <i>b</i> | <i>bla</i> <sub>KPC-2</sub> , <i>bla</i> <sub>KPC-2</sub>                 | Chile                     | 2019          | [180] |
|       | Tn4401 <i>b</i> | <i>bla</i> <sub>KPC-33</sub>                                              |                           |               |       |
| Human | Tn5051-like     | <i>bla</i> <sub>CARB-2</sub> , <i>aadA2</i> , <i>qacEΔ1</i> , <i>sul1</i> | Netherland                | 2015          | [146] |

**Table S4.** Characterization of mobile genetic elements (MGEs), insertion sequences (ISs), associated with antibiotic resistance genes (ARGs) in *P. aeruginosa*

| Source | ISs                                        | ARGs associated                                              | Geographic region | Year             | Reference |
|--------|--------------------------------------------|--------------------------------------------------------------|-------------------|------------------|-----------|
| Human  | ISKpn19, IS26                              | <i>qnrS1</i>                                                 | Argentina         | 2012             | [149]     |
| Human  | IS1326, IS1353                             | <i>aadA1, qacEΔ1, sul1</i>                                   | Russia            | 2013-2016        | [137]     |
|        | IS1326, IS1353                             | <i>bla<sub>IMP-1</sub>, aac(6')-Iae, aadA1, qacEΔ1, sul1</i> |                   |                  |           |
| Human  | ISCR14                                     | <i>rmtD</i>                                                  | Brazil            | 2017             | [50]      |
| Human  | ISPsy6, ISPa21                             | <i>bla<sub>GES-1</sub>, acc(6')-Ib, aph(3')-XV</i>           | China             | 2010             | [55]      |
| Human  | ISAbal25, IS91                             | <i>bla<sub>NDM-1</sub></i>                                   |                   |                  | [187]     |
| Human  | ISPa51, ISPa52                             | <i>oprD</i>                                                  | Poland            | 2009, 2010       | [197]     |
| Human  | insertion sequence                         | <i>aph(3')-IIb, bla<sub>oxa-50</sub></i>                     | India, Australia  |                  | [198]     |
| Human  | ISPa11                                     | <i>mexZ, mexR, mexT, ampR, pmrA</i>                          | Canada            | 1997             | [199]     |
| Human  | IS6100                                     | <i>bla<sub>KPC</sub></i>                                     | China             |                  | [154]     |
| Human  | insertion sequence                         | <i>oprD</i>                                                  |                   |                  | [200]     |
| Human  | IS6100                                     | <i>bla<sub>VIM-2</sub>, AmpD</i>                             | Spain             | 2020             | [189]     |
|        | ISPa17                                     | <i>bla<sub>IMP-13</sub></i>                                  |                   |                  |           |
| Human  | IS6100, ISKpn27, ISKpn6                    | <i>bla<sub>KPC</sub></i>                                     | China             | 2021             | [162]     |
| Human  | ISPa8                                      | <i>oprD</i>                                                  | U.S.A             |                  | [201]     |
| Human  | ISKpn6-like, ISkpn8-like                   | <i>bla<sub>KPC-2</sub></i>                                   | China             | 2009-2018        | [24]      |
| Human  | insertion sequence                         | <i>oprD</i>                                                  | U.S.A             |                  | [33]      |
| Human  | ISPa46                                     | <i>oprD</i>                                                  | France            | 2011             | [202]     |
| Human  | ISRP10                                     | <i>oprD</i>                                                  | China             | 2009-2010        | [203]     |
| Human  | ISPa1328, ISPsme1, ISPa26, ISPst2, ISPa195 | <i>oprD</i>                                                  | Russia            | 2012-2017        | [111]     |
| Human  | ISPa45                                     | <i>oprD</i>                                                  | Spain             | 2008-2010        | [112]     |
| Human  | ISPa195                                    | <i>oprD</i>                                                  | Russia            | 2013             | [204]     |
| Human  | IS26, ISKpn27, ISKpn6, IS26, IS26          | <i>bla<sub>KPC-2</sub></i>                                   | China             | 2018             | [173]     |
| Human  | ISPa1328                                   | <i>oprD</i>                                                  | France            |                  | [205]     |
| Human  | ISPPu21                                    | <i>oprD</i>                                                  | Iran              | 2014-2015        | [206]     |
| Human  | IS21                                       | <i>mexR</i>                                                  | France            | 1996             | [207]     |
| Human  | ISPA26                                     | <i>oprD</i>                                                  | South Africa      | 2000, 2004, 2006 | [208]     |
|        | ISPa133                                    | <i>oprD</i>                                                  |                   |                  | [209]     |
| Human  | IS1411                                     | <i>oprD</i>                                                  | China             | 2011-2016        | [210]     |

**Table S8.** Mobile ARGs, their major ST carriers, MGEs responsible for their dissemination and their One Health origin based on genome database survey and systematic literature survey

| Antibiotic class | ARG name                     | Genome database survey        |                                      |                                                                                                                                                                                                                                                 |                                     |        |             |                               | Systematic literature analysis |                                           |
|------------------|------------------------------|-------------------------------|--------------------------------------|-------------------------------------------------------------------------------------------------------------------------------------------------------------------------------------------------------------------------------------------------|-------------------------------------|--------|-------------|-------------------------------|--------------------------------|-------------------------------------------|
|                  |                              | Proportion in all genomes (%) | No. of types of STs carrying the ARG | Major STs carriers of the ARG, with more than 10 genomes (proportion of the ARG-carrying genomes per all genomes of each ST)                                                                                                                    | Proportion in One-health sector (%) |        |             | Associated MGEs               | ARGs linked to MGEs            | Associated MGEs                           |
|                  |                              |                               |                                      |                                                                                                                                                                                                                                                 | Human                               | Animal | Environment |                               |                                |                                           |
| Amino-glycoside  | <i>aac(6')-Ib</i>            | 14.7                          | 93                                   | 235 (6.52), 111 (30.66), 621 (18.85), 244 (8.33), 277 (14.38), 308 (116.41), 357 (15.79), 316 (5.42), 348 (36.08), 664 (26.72), 175 (16), 233 (16.67), 253 (34.94), 773 (18.58), 179 (10.53), 654 (77.39), 17 (23.64), 309 (63.16), 446 (27.69) | 16.1                                | 5.2    | 11.5        | integron, transposon, plasmid | Yes                            | integron, plasmid, transposon             |
|                  | <i>aph(6)-Id</i>             | 6.7                           | 99                                   | 111 (2.68), 179 (9.52), 233 (30.14), 235 (12.11), 244 (13.91), 308 (32.82), 313 (16.39), 316 (11.49), 357 (28.42), 446 (11.58), 463 (4.81), 644 (84.62), 654 (92.73), 823 (77.78), 1047 (111.11), 1203 (77.78), 1418 (94.12)                    | 7.1                                 | 12.6   | 4.3         | integron, transposon, plasmid |                                |                                           |
|                  | <i>aph(3'')-Ib</i>           | 6.3                           | 92                                   | 179 (8.93), 233 (26.03), 235 (10.55), 244 (15.41), 308 (32.82), 316 (10.34), 357 (26.78), 463 (4.81), 654 (90.91), 823 (77.78), 1047 (111.11), 1203 (83.33), 1418 (94.12)                                                                       | 6.8                                 | 8.7    | 4.3         | integron, transposon, plasmid |                                |                                           |
|                  | <i>ant(3'')-IIa</i>          | 5.4                           | 71                                   | 175 (87.7), 233 (15.1), 235 (17.4), 244 (3.8), 298 (17.3), 357 (41.5), 395 (7.2), 463 (5.8)                                                                                                                                                     | 7.3                                 | 4.3    | 6.2         | integron, transposon, plasmid | Yes                            | integron, plasmid, transposon, IS         |
|                  | <i>ant(2'')-Ia</i>           | 6.4                           | 71                                   | 111 (2.4), 167 (72.2), 179 (7.1), 233 (16.4), 235 (19.7), 244 (4.5), 309 (33.3), 357 (50.8), 485 (45.5), 621 (78.3), 1976 (86.7), 2731 (200)                                                                                                    | 6.0                                 | 1.3    | 2.7         | integron, transposon, plasmid | Yes                            | integron, plasmid, transposon             |
|                  | <i>aadA2</i>                 | 2.6                           | 27                                   | 111 (20.19), 233 (62.33), 235 (3.52), 412 (55.17)                                                                                                                                                                                               | 2.9                                 | 3.9    | 0.3         | integron, transposon          | Yes                            | integron, transposon                      |
|                  | <i>aac(6')-II</i>            | 2.7                           | 23                                   | 233 (52.05), 235 (13.87), 308 (13.74), 357 (24.04)                                                                                                                                                                                              | 3.4                                 | 0.9    | 1.4         | integron, transposon          | Yes                            | integron, plasmid, transposon             |
|                  | <i>aph(3')-VIa</i>           | 2.1                           | 42                                   | 235 (7.03), 357 (17.49), 654 (54.55)                                                                                                                                                                                                            | 2.6                                 | 3.0    | 0.0         | integron, transposon, plasmid |                                |                                           |
|                  | <i>aac(3)-Id</i>             | 1.4                           | 7                                    | 233 (58.9), 235 (2.34), 308 (11.45), 823 (61.11)                                                                                                                                                                                                | 1.8                                 | 0.9    | 0.8         | integron                      |                                |                                           |
|                  | <i>aph(3')-Ia</i>            | 1.3                           | 31                                   | 235 (2.73), 485 (45.45), 1971 (136.36)                                                                                                                                                                                                          | 1.3                                 | 3.5    | 1.9         | plasmid                       |                                |                                           |
|                  | <i>aac(3)-IIa</i>            | 1.0                           | 28                                   | 235 (4.1), 1418 (94.12)                                                                                                                                                                                                                         | 1.3                                 | 0.4    | 0.2         | transposon, plasmid           | Yes                            | plasmid, transposon                       |
|                  | <i>rmtB</i>                  | 0.9                           | 21                                   | 773 (61.54), 1418 (94.12)                                                                                                                                                                                                                       | 1.2                                 | 0.0    | 0.2         | transposon                    |                                |                                           |
|                  | <i>ant(4')-IIb</i>           | 0.8                           | 23                                   | 233 (7.53), 654 (23.64), 664 (60.53)                                                                                                                                                                                                            | 0.9                                 | 0.0    | 2.4         | transposon                    |                                |                                           |
|                  | <i>aac(6')-IIa</i>           | 0.8                           | 20                                   | 235 (3.13), 463 (10.58), 1418 (88.24)                                                                                                                                                                                                           | 1.0                                 | 0.9    | 0.0         | transposon, plasmid           |                                |                                           |
|                  | <i>aac(6')-Ib7</i>           | 0.6                           | 13                                   | 111 (5.84), 357 (5.46)                                                                                                                                                                                                                          | 0.6                                 | 0.0    | 0.5         | integron, transposon          |                                |                                           |
|                  | <i>aac(6')-29a</i>           | 0.5                           | 3                                    | 111 (11.68)                                                                                                                                                                                                                                     | 0.5                                 | 0.0    | 0.3         | integron, transposon          |                                |                                           |
|                  | <i>aadA13</i>                | 0.6                           | 13                                   | 175 (13.11), 1418 (94.12)                                                                                                                                                                                                                       | 0.8                                 | 0.0    | 0.0         | transposon                    | Yes                            | integron, transposon                      |
|                  | <i>aac(6')-31</i>            | 0.4                           | 2                                    | 235 (4.49)                                                                                                                                                                                                                                      | 0.4                                 | 0.0    | 0.0         | integron                      |                                |                                           |
| β-Lactam         | <i>bla<sub>VIM-1</sub></i>   | 5.8                           | 55                                   | 111 (41.12), 175 (31.97), 179 (5.95), 233 (71.92), 235 (8.98), 308 (7.63), 357 (5.46), 654 (43.64), 823 (105.56)                                                                                                                                | 5.8                                 | 1.3    | 3.0         | integron, transposon, plasmid | Yes                            | integron, plasmid                         |
|                  | <i>bla<sub>DOXA-10</sub></i> | 5.4                           | 61                                   | 111 (3.89), 175 (9.02), 233 (14.38), 235 (11.52), 244 (11.65), 260 (19.05), 277 (51.55), 298 (19.75), 308 (7.63), 357 (49.18), 664 (71.05), 1418 (94.12), 1976 (86.67)                                                                          | 6.5                                 | 0.4    | 3.8         | integron, transposon, plasmid | Yes                            | integron, plasmid, transposon             |
|                  | <i>bla<sub>KPC-2</sub></i>   | 3.8                           | 45                                   | 235 (3.52), 244 (6.39), 463 (98.56), 485 (45.45), 1076 (31.58), 1212 (67.86)                                                                                                                                                                    | 5.2                                 | 0.0    | 0.0         | plasmid                       | Yes                            | plasmid, transposon, IS                   |
|                  | <i>bla<sub>DOXA-2</sub></i>  | 3.3                           | 38                                   | 111 (3.65), 235 (12.89), 309 (17.33), 357 (9.29), 446 (10.53), 621 (78.26)                                                                                                                                                                      | 4.0                                 | 0.9    | 0.0         | integron, transposon          | Yes                            | integron, plasmid                         |
|                  | <i>bla<sub>GES-1</sub></i>   | 2.7                           | 31                                   | 235 (28.13), 309 (32), 654 (25.45), 1203 (55.56)                                                                                                                                                                                                | 2.8                                 | 0.4    | 1.9         | transposon                    | Yes                            | integron, plasmid, transposon, IS         |
|                  | <i>bla<sub>DERP-1</sub></i>  | 2.4                           | 45                                   | 155 (25.25), 316 (6.32), 357 (7.1), 386 (70.59), 395 (7.23), 560 (41.94)                                                                                                                                                                        | 2.3                                 | 2.6    | 3.3         | integron                      |                                |                                           |
|                  | <i>bla<sub>DOXA-1</sub></i>  | 2.1                           | 39                                   | 233 (68.49), 235 (2.93), 664 (57.89)                                                                                                                                                                                                            | 2.6                                 | 2.6    | 0.8         | integron, transposon, plasmid | Yes                            | integron, transposon, plasmid, transposon |
|                  | <i>bla<sub>CARB-1</sub></i>  | 1.9                           | 23                                   | 111 (23.11), 235 (2.93), 463 (11.54)                                                                                                                                                                                                            | 2.1                                 | 0.4    | 0.0         | integron, transposon          |                                |                                           |
|                  | <i>bla<sub>NDM-1</sub></i>   | 1.5                           | 13                                   | 308 (14.5), 357 (19.67), 644 (92.31), 654 (32.73), 773 (63.08)                                                                                                                                                                                  | 1.9                                 | 0.0    | 1.1         | integron, transposon          | Yes                            | integron, plasmid, transposon, IS         |
|                  | <i>bla<sub>VEB-1</sub></i>   | 1.4                           | 11                                   | 235 (4.88), 357 (45.9)                                                                                                                                                                                                                          | 1.7                                 | 0.0    | 1.3         | integron, transposon, plasmid | Yes                            | integron, plasmid                         |



|                    |                            |      |     |                                                                                                                                                                                                                                                                                                                                                                                                                                                                                                                                                                  |      |      |      |                               |     |                                   |
|--------------------|----------------------------|------|-----|------------------------------------------------------------------------------------------------------------------------------------------------------------------------------------------------------------------------------------------------------------------------------------------------------------------------------------------------------------------------------------------------------------------------------------------------------------------------------------------------------------------------------------------------------------------|------|------|------|-------------------------------|-----|-----------------------------------|
|                    | <i>bla<sub>IMP-1</sub></i> | 1.3  | 20  | 111 (9.73), 235 (5.08), 357 (8.2), 1976 (80)                                                                                                                                                                                                                                                                                                                                                                                                                                                                                                                     | 1.6  | 0.0  | 0.0  | plasmid                       | Yes | integron, plasmid, transposon     |
|                    | <i>bla<sub>PER-1</sub></i> | 0.9  | 23  | 235 (3.32), 244 (5.26), 1418 (94.12)                                                                                                                                                                                                                                                                                                                                                                                                                                                                                                                             | 1.1  | 0.0  | 0.0  | transposon, plasmid           |     |                                   |
|                    | <i>bla<sub>DXA-9</sub></i> | 0.5  | 3   | 111 (12.41)                                                                                                                                                                                                                                                                                                                                                                                                                                                                                                                                                      | 0.6  | 0.0  | 0.0  | integron, transposon          |     |                                   |
|                    | <i>bla<sub>IMP-9</sub></i> | 0.3  | 20  |                                                                                                                                                                                                                                                                                                                                                                                                                                                                                                                                                                  | 0.4  | 1.7  | 0.0  | plasmid                       | Yes | integron, plasmid, transposon     |
|                    | <i>bla<sub>TEM-1</sub></i> | 0.2  | 6   | 463 (7.69)                                                                                                                                                                                                                                                                                                                                                                                                                                                                                                                                                       | 0.3  | 0.0  | 0.0  | plasmid                       |     |                                   |
| MLSB               | <i>msrE</i>                | 1.1  | 31  | 308 (15.27), 463 (7.69)                                                                                                                                                                                                                                                                                                                                                                                                                                                                                                                                          | 1.2  | 1.7  | 1.3  | transposon, plasmid           |     |                                   |
|                    | <i>mphE</i>                | 0.8  | 31  | 463 (7.69)                                                                                                                                                                                                                                                                                                                                                                                                                                                                                                                                                       | 1.0  | 1.7  | 0.3  | transposon, plasmid           | Yes | plasmid, transposon               |
| Sulfonamide        | <i>sul1</i>                | 39.2 | 150 | 17 (10.33), 111 (83.21), 155 (7.92), 167 (61.11), 175 (210.66), 179 (19.05), 233 (202.05), 234 (55.88), 235 (144.73), 244 (29.7), 253 (10.54), 260 (50.79), 277 (125.77), 282 (40.63), 292 (137.5), 298 (25.93), 308 (38.93), 309 (46.67), 313 (16.39), 316 (164.37), 348 (38.55), 357 (131.15), 360 (50), 395 (25.3), 412 (55.17), 446 (43.16), 463 (29.33), 485 (45.45), 621 (96.52), 644 (230.77), 654 (160), 664 (100), 697 (120), 708 (70.59), 773 (120), 1047 (166.67), 1203 (161.11), 1418 (123.53), 1971 (136.36), 1976 (100), 2592 (150), 3986 (333.33) | 44.6 | 16.5 | 17.9 | integron, transposon, plasmid | Yes | integron, plasmid, transposon, IS |
| Diamino-pyrimidine | <i>dfrB5</i>               | 1.5  | 12  | 233 (60.27), 235 (2.34), 308 (11.45)                                                                                                                                                                                                                                                                                                                                                                                                                                                                                                                             | 1.9  | 0.9  | 0.8  | integron                      |     |                                   |
|                    | <i>dfrA5</i>               | 0.7  | 15  | 233 (8.9), 235 (3.13), 644 (7.69), 883 (16.67)                                                                                                                                                                                                                                                                                                                                                                                                                                                                                                                   | 0.7  | 0.0  | 1.7  | transposon                    |     |                                   |
|                    | <i>dfrB2</i>               | 0.6  | 7   | 357 (27.32)                                                                                                                                                                                                                                                                                                                                                                                                                                                                                                                                                      | 0.7  | 0.0  | 1.3  | integron                      |     |                                   |
|                    | <i>dfrA10</i>              | 0.3  | 9   | 233 (7.53)                                                                                                                                                                                                                                                                                                                                                                                                                                                                                                                                                       | 0.2  | 0.0  | 1.6  | transposon                    |     |                                   |
|                    | <i>dfrA27</i>              | 0.2  | 9   |                                                                                                                                                                                                                                                                                                                                                                                                                                                                                                                                                                  | 0.3  | 0.0  | 0.0  | plasmid                       |     |                                   |
| Phenicol           | <i>floR</i>                | 6.4  | 52  | 233 (87.67), 235 (21.68), 308 (24.43), 316 (48.85), 357 (14.75), 644 (115.38), 654 (54.55), 664 (60.53), 773 (63.08), 1203 (105.56)                                                                                                                                                                                                                                                                                                                                                                                                                              | 7.4  | 5.7  | 5.5  | integron, transposon, plasmid | Yes | integron, plasmid, transposon     |
|                    | <i>cmlA1</i>               | 3.8  | 45  | 233 (63.7), 235 (15.63), 357 (13.66), 463 (7.21), 1418 (94.12), 1971 (127.27)                                                                                                                                                                                                                                                                                                                                                                                                                                                                                    | 4.7  | 3.0  | 0.5  | integron, transposon, plasmid | Yes | integron, plasmid, transposon     |
|                    | <i>catB3</i>               | 1.2  | 34  | 235 (7.23), 485 (45.45)                                                                                                                                                                                                                                                                                                                                                                                                                                                                                                                                          | 1.5  | 1.7  | 0.0  | plasmid                       | Yes | integron, plasmid, transposon     |
|                    | <i>cmlB</i>                | 0.5  | 1   | 111 (12.17)                                                                                                                                                                                                                                                                                                                                                                                                                                                                                                                                                      | 0.6  | 0.0  | 0.0  | integron, transposon          |     |                                   |
| Quinolone          | <i>qnrVC1</i>              | 3.5  | 46  | 233 (11.64), 308 (19.85), 316 (68.39), 357 (8.2), 773 (73.85), 1203 (55.56)                                                                                                                                                                                                                                                                                                                                                                                                                                                                                      | 4.4  | 3.0  | 3.0  | integron, transposon, plasmid | Yes | integron, plasmid, transposon     |
| MDR                | <i>qacEΔ1</i>              | 17.0 | 104 | 111 (55.47), 175 (84.43), 179 (6.55), 233 (58.9), 235 (78.91), 244 (11.65), 253 (7.53), 260 (20.63), 277 (25.77), 298 (22.22), 308 (13.74), 316 (13.79), 348 (28.92), 357 (51.37), 395 (9.64), 412 (55.17), 446 (18.95), 463 (5.29), 485 (42.42), 621 (81.74), 773 (60), 1203 (77.78), 1418 (82.35)                                                                                                                                                                                                                                                              | 19.0 | 5.2  | 9.8  | integron, transposon, plasmid | Yes | integron, plasmid, transposon, IS |
|                    | <i>qacE</i>                | 1.5  | 28  | 111 (3.89), 175 (22.95), 235 (10.94)                                                                                                                                                                                                                                                                                                                                                                                                                                                                                                                             | 1.1  | 0.0  | 0.9  | integron, transposon          | Yes | integron, plasmid                 |
| etc                | <i>brp</i>                 | 0.7  | 10  | 357 (16.94), 463 (7.69)                                                                                                                                                                                                                                                                                                                                                                                                                                                                                                                                          | 0.9  | 0.0  | 0.0  | transposon, plasmid           |     |                                   |
